# Supplementary material for: Magnitude and determinants of plant root hydraulic redistribution: A global synthesis analysis
Source: Front Plant Sci. 2022 Jul 22;13:918585. doi: 10.3389/fpls.2022.918585 (PMC9355616; doi:10.3389/fpls.2022.918585)
Supplement: Supplementary file 1 [file Data_Sheet_1.xls]

## Sheet: dataset
Number	Year Data Taken	Authors	Paper Title	Latitude	Longitude	Plant Species	Seed	Type of Investigation	Soil Type	Terrestrial Biomes	Mean Magnitude of HR	Standard Deviation in HR	Samples	Water Table Depth (m)	Humidity Index	Plant Root Length (cm)	Average Transpiration (mm)	Average HR as Transpiration (%)	Mean Annual Precipitation (mm)
1	1989	Caldwell and Richards	Hydraulic lift: water efflux from upper roots improves effectiveness of water uptake by deep roots	41.7409	-111.812	Sagebrush	Angiosperm	Field Studies	Sandy	Temperate grassland	0.34	0.1	5	10.67	0.3598	20	1	0.34	423
2	2007	Cardon et al.,	Rapid soil moisture recharge to depth by roots in a stand of Artemisia tridentata	41.7409	-111.812	Sagebrush	Angiosperm	Field Studies	loam	Temperate grassland	0.086	0.012	3	15.67	0.3598	42.5	0.342629	0.251	423
3	1996	Emerman & Dawson	Hydraulic lift and its influence on the water content of the rhizosphere: An example from sugar maple, Acer saccharum	42.4334	-76.4998	sugar maple trees	Angiosperm	Field Studies	loam	Temperate forest	1.3	0.66	3	2.46	0.915	128.5	5.60345	0.232	1569
4	2002	Brooks JR et al.,	Hydraulic redistribution of soil water during summer drought in two contrasting Pacific Northwest coniferous forests	44.5001	-121.617	ponderosa pine	Angiosperm	Field Studies	Sandy	Needleleaf or broadleaf forest	0.13	0.05	4	29.21	1.4213	60.8	0.370741	0.350649	1822
5	2002	Brooks JR et al.,	Hydraulic redistribution of soil water during summer drought in two contrasting Pacific Northwest coniferous forests	45.8167	-121.95	Douglas-fir	Gymnosperm	Field Studies	Sandy	Needleleaf or broadleaf forest	0.27	0.05	4	18.69	1.34	105	2.3625	0.114286	2500
6	2004	Meinzer et al.,	Converging patterns of uptake and hydraulic redistribution of soil water in contrasting woody vegetation types	45.8167	-121.95	Pseudotsuga menziesii（24 year old)	Gymnosperm	Field Studies	Sandy	Needleleaf or broadleaf forest	0.1	0.04	6	30.23	1.34	40	1.11111	0.09	2500
7	2004	Meinzer et al.,	Converging patterns of uptake and hydraulic redistribution of soil water in contrasting woody vegetation types	45.8167	-121.95	old-growth Pseudotsuga menziesii	Gymnosperm	Field Studies	Sandy	Needleleaf or broadleaf forest	0.08	0.04	4	30.23	1.34	40	1.5	0.0533333	2500
8	2004	Meinzer et al.,	Converging patterns of uptake and hydraulic redistribution of soil water in contrasting woody vegetation types	44.5001	-121.617	ponderosa pine (old-growth)	Angiosperm	Field Studies	Sandy	Needleleaf or broadleaf forest	0.08	0.02	4	29.21	1.29	40	0.7	0.114286	1822
9	2004	Meinzer et al.,	Converging patterns of uptake and hydraulic redistribution of soil water in contrasting woody vegetation types	-15.9333	-47.8833	Acacia tortilis	Angiosperm	Field Studies	Clay	Savannshs	0.18	0.01	4	16.6	1.251	40	0.962567	0.187	1652
10	2004	Meinzer et al.,	Converging patterns of uptake and hydraulic redistribution of soil water in contrasting woody vegetation types	-15.9333	-47.8833	Acacia tortilis	Angiosperm	Field Studies	Clay	Savannshs	0.25	0.07	4	20.67	1.09	40	1.04167	0.24	1652
11	2004	Meinzer et al.,	Converging patterns of uptake and hydraulic redistribution of soil water in contrasting woody vegetation types	-15.9333	-47.8833	Acacia tortilis	Angiosperm	Field Studies	Clay	Savannshs	0.15	0.01	4	21.11	1.29	40	1.875	0.08	1652
12	2005	Warren et al.,	Vertical stratification of soil water storage and release dynamics in Pacific Northwest coniferous forests	45.8167	-121.95	Pseudotsuga menziesii（24 year old)	Gymnosperm	Field Studies	Sandy	Needleleaf or broadleaf forest	0.11	0.03	8	30.21	1.34	37.5	1	0.11	2500
13	2007	Warren et al.,	Hydraulic redistribution of soil water in two old-growth coniferous forests: quantifying patterns and controls	45.8167	-121.95	Pseudotsuga menziesii（24 year old)	Gymnosperm	Field Studies	Sandy	Needleleaf or broadleaf forest	0.08	0.03	8	31.21	1.34	107.5	0	0.1	2000
14	2002	Brooks JR， et al.	Hydraulic redistribution of soil water during summer drought in two contrasting Pacific Northwest coniferous forests	44.5001	-121.617	ponderosa pine	Angiosperm	Field Studies	Sandy	Needleleaf or broadleaf forest	0.13	0.03	4	29.21	1.45	40	3.25	0.04	1822
15	2005	Warren et al.,	Vertical stratification of soil water storage and release dynamics in Pacific Northwest coniferous forests	45.8167	-121.95	Pseudotsuga menziesii（24 year old)	Gymnosperm	Field Studies	Sandy	Needleleaf or broadleaf forest	0.06	0.04	4	30.12	1.33	37.5	1.5	0.04	1800
16	2007	Warren et al.,	Hydraulic redistribution of soil water in two old-growth coniferous forests: quantifying patterns and controls	45.8167	-121.95	Pseudotsuga menziesii（24 year old)	Gymnosperm	Field Studies	Sandy	Needleleaf or broadleaf forest	0.12	0.05	4	30.21	1.36	107.5	2	0.06	2300
17	2003	Ludwig et al.,	Hydraulic lift in Acacia tortilis trees on an East African savanna	-4.0991	37.2638	Acacia tortilis	Angiosperm	Field Studies	loam	Temperate grassland	0.508333	0.275	3	9.34	0.41	28.5	5.46595	0.093	707
18	2005	Warren et al.,	Vertical stratification of soil water storage and release dynamics in Pacific Northwest coniferous forests	45.8167	-121.95	Pseudotsuga menziesii（24 year old)	Gymnosperm	Field Studies	Sandy	Needleleaf or broadleaf forest	0.07	0.04	4	30.11	1.3	37.5	1.75	0.04	2200
19	2006	Brooks et al.,	Hydraulic redistribution of soil water in two old-growth coniferous forests: quantifying patterns and controls	45.8167	-121.95	Pseudotsuga menziesii（24 year old)	Gymnosperm	Field Studies	Sandy	Needleleaf or broadleaf forest	0.06	0.04	27	30.56	1.35	40	0.857143	0.07	2000
20	2010	Scholz et al.,	Hydraulic lift in a Neotropical savanna: Experimental manipulation and model simulations	-15.9333	-47.8833	Acacia tortilis	Angiosperm	Field Studies	Clay	Savannshs	0.08	0.04	4	4.5	1.29	20	2	0.04	1652
21	2010	Scholz et al.,	Hydraulic lift in a Neotropical savanna: Experimental manipulation and model simulations	-15.9333	-47.8833	Heteropogon triticeus	Angiosperm	Field Studies	Clay	Savannshs	0.06	0.03	4	4.4	1.29	20	2	0.03	1652
22	2004	da Rocha et al.,	Seasonality of water and heat fluxes over a tropical forest in eastern Amazonia	-3.0103	-54.5815	Acacia tortilis	Angiosperm	Field Studies	loam	Savannshs	0.28	0.04	4	8.55	0.41	32.5	3.68421	0.076	707
23	2006	Kurz - Besson et al.,	Hydraulic lift in cork oak trees in a savannah-type Mediterranean ecosystem and its contribution to the local water balance	38.5274	-8.023	Quercus suber	Angiosperm	Field Studies	loam	Needleleaf or broadleaf forest	0.86	0.91	27	9.13	0.5097	116	1.08667	0.791411	600
24	2010	Domec et al.,	Hydraulic redistribution of soil water by roots affects whole-stand evapotranspiration and net ecosystem carbon exchange	38.8	-76.6667	18-yr-old loblolly pine (Pinus taeda L.)	Gymnosperm	Field Studies	loam	Temperate forest	0.42	0.29	4	2.21	0.3312	35	2.1	0.2	1320
25	2001	Burgess et al.,	Tree roots: conduits for deep recharge of soil water	-33.75	117.45	Eucalyptus in Western Australia	Angiosperm	Field Studies	loam	Temperate forest	1.64643	0.92429	3	0.26	0.5601	220	6.83165	0.241	468
26	2003	Ryel et al.,	Hydraulic redistribution in a stand of Artemisia tridentata: evaluation of benefits to transpiration assessed with a simulation model	40.2833	-112.467	Artemisia tridentata	Angiosperm	Field Studies	loam	Needleleaf or broadleaf forest	1.4	1.1	6	1.12	0.6598	85	3.78378	0.37	423
27	2004	Hultine et al.,	Hydraulic redistribution by a dominant, warm-desert phreatophyte: seasonal patterns and response to precipitation pulses	31.6667	-111.183	Prosopis velutina	Angiosperm	Field Studies	loam	Needleleaf or broadleaf forest	1.47525	1.22772	3	0.54	0.54	122	3.59816	0.41	341
28	2008	Scott et al.,	Temporal dynamics of stem expansion and contraction in savanna trees: withdrawal and recharge of stored water	-15.9333	-47.8833	Prosopis velutina	Angiosperm	Field Studies	Clay	Savannshs	0.16	0.13	3	17.2	0.292	60	1.77778	0.09	1652
29	2008	Scott et al.,	Biophysical and life-history determinants of hydraulic lift in Neotropical savanna trees	-15.9333	-47.8833	Prosopis velutina	Angiosperm	Field Studies	Clay	Savannshs	0.457143	0.371429	3	17.2	0.291	55	1.69312	0.27	1652
30	2014	Yu et al.,	Patterns，magnitude and controlling factors of hydraulic redistribution by Populus euphratica roots	42.0167	100.35	Populus euphratica	Angiosperm	Field Studies	Sandy	Deserts or sparsely vegetated	0.21	0.05	2	5.02	0.06	80	0.538462	0.39	37.4
31	2017	Hafner, B. D.	Hydraulic redistribution under moderate drought among English oak, European beech and Norway spruce determined by deuterium isotope labeling in a split-root experiment	48.4	11.6833	Beech	Angiosperm	Field Studies	loam	Temperate forest	0.5	0.01	17	4.25	0.82	75	0.819672	0.61	1500
32	2017	Hafner, B. D.	Hydraulic redistribution under moderate drought among English oak, European beech and Norway spruce determined by deuterium isotope labeling in a split-root experiment	48.4	11.6833	Oak	Angiosperm	Field Studies	loam	Temperate forest	0.8	0.09	14	5.75	0.81	85	1.21212	0.66	1700
33	2017	Hafner, B. D.	Hydraulic redistribution under moderate drought among English oak, European beech and Norway spruce determined by deuterium isotope labeling in a split-root experiment	48.4	11.6833	Spruce	Gymnosperm	Field Studies	Sandy	Temperate forest	0.5	0.01	13	3.75	0.962	75	0.862069	0.58	1478
34	2018	Bogie, NA	Hydraulic Redistribution by Native Sahelian Shrubs: Bioirrigation to Resist In-Season Drought	14.75	-16.85	Pennisetum glaucum（pearl millet）	Angiosperm	Field Studies	Sandy	Temperate grassland	0.11	0.017	3	30.21	0.21	15	1.22222	0.09	750
35	2013	Yu, TengFei	Patterns, magnitude, and controlling factors of hydraulic redistribution of soil water by Tamarix ramosissima roots	42.0167	100.35	Tamarix ramosissima	Angiosperm	Field Studies	Sandy	Deserts or sparsely vegetated	0.48	0.32	2	2.47	0.05	50	1.37143	0.35	880
36	2002	Ryel et al.,	Hydraulic redistribution in a stand of Artemisia tridentata: evaluation of benefits to transpiration assessed with a simulation model	40.2834	-112.467	Artemisia tridentata	Angiosperm	Modelling Studies,	loam	Needleleaf or broadleaf forest	0.73	0.31	6	2.12	0.3598	90	3.4	0.214706	423
37	2002	Mendel et al.,	On a better understanding of hydraulic lift: A numerical study	42.4334	-76.4998	New England Sugar Maple	Angiosperm	Modelling Studies,	loam	Temperate forest	1.52	0.36	4	1.17	0.805	244	4.43312	0.342874	1569
38	2008	Siqueira et al.,	Onset of water stress, hysteresis in plant conductance, and hydraulic lift: Scaling soil water dynamics from millimeters to meters	41.7409	-111.812	Artemisia	Angiosperm	Modelling Studies,	loam	Temperate grassland	0.67	0.27	3	4.33	0.403	85	1.95	0.34359	452
39	2010	Scholz et al.,	Hydraulic lift in a Neotropical savanna: Experimental manipulation and model simulations	-15.9333	-47.8833	Savanna	Angiosperm	Modelling Studies,	Clay	Savannshs	0.46	0.18	4	17.1	1.09	60	1.88	0.244681	1652
40	2005	Lee et al.,	Root functioning modifies seasonal climate	-3.0103	-54.5815	Acer robustum Pax	Angiosperm	Modelling Studies,	loam	Savannshs	0.65	0.25	8	7.55	0.29	75	3.5	0.185714	850
41	2008	Amenu & Kumar	A model for hydraulic redistribution incorporating coupled soil-root moisture transport	37.2845	-119.326	lodgepolepine, ponderosa pine	Gymnosperm	Modelling Studies,	loam	Needleleaf or broadleaf forest	1.13	0.53	27	2.67	0.8181	125	2	0.565	382
42	2007	Zheng & Wang	Modelling the dynamic root water uptake and its hydrological impact at the Reserva Jaru site in Amazonia	10.0833	-61.9016	Eucalyptus	Angiosperm	Modelling Studies,	Clay	Savannshs	0.3	0.24	4	15.01	0.34	90	3.4	0.0882353	450
43	2007	Zheng & Wang	Modelling the dynamic root water uptake and its hydrological impact at the Reserva Jaru site in Amazonia	10.0833	-61.9016	Eucalyptus	Angiosperm	Modelling Studies,	Clay	Savannshs	0.24	0.16	4	15.01	0.34	90	3.6	0.0666667	440
44	2007	Zheng & Wang	Modelling the dynamic root water uptake and its hydrological impact at the Reserva Jaru site in Amazonia	10.0833	-61.9016	Eucalyptus	Angiosperm	Modelling Studies,	Clay	Savannshs	0.29	0.2	4	15.01	0.34	90	3.6	0.0805556	423
45	2007	Zheng & Wang	Modelling the dynamic root water uptake and its hydrological impact at the Reserva Jaru site in Amazonia	10.0833	-61.9016	Eucalyptus	Angiosperm	Modelling Studies,	Clay	Savannshs	0.1	0.09	4	30.23	1.34	50	3.7	0.027027	440
46	2011	Wang et al.,	Assessing the potential hydrological impacts of hydraulic redistribution in Amazonia using a numerical Modelling approach	-3.0103	-54.5815	Eucalyptus	Angiosperm	Modelling Studies,	loam	Savannshs	0.2366	0.187427	20	14.55	0.29	50	1.6	0.147875	850
47	2013	David, Teresa S.	Root functioning, tree water use and hydraulic redistribution in Quercus suber trees: A Modelling approach based on root sap flow	38.8332	-8.8332	Quercus suber	Angiosperm	Modelling Studies,	loam	Needleleaf or broadleaf forest	0.71	0.38	4	2.01	0.5276	100	1.91892	0.37	600
